# Supplementary material for: Separation of ethanol–water mixtures by liquid–liquid extraction using phosphonium-based ionic liquids
Source: Royal Society of Chemistry journal article supplement (doi:10.1039/c1gc15079k), 2011-01-01
Supplement: c1gc15079k.pdf [file c1gc15079k.pdf]

# Supporting Information

## Separation of ethanol-water mixtures by liquid- liquid extraction using phosphonium-based ionic liquids

*Catarina M. S. S. Neves<sup>a</sup>, José F. O. Granjo<sup>b</sup>, Mara G. Freire<sup>a</sup>, Al Robertson<sup>c</sup>, Nuno M.C.  
Oliveira<sup>b</sup> and João A. P. Coutinho<sup>a\*</sup>*

<sup>a</sup>CICECO, Departamento de Química, Universidade de Aveiro, 3810-193 Aveiro,  
Portugal

<sup>b</sup>CIEPQPF, Departamento de Engenharia Química, Universidade de Coimbra, 3030-790  
Coimbra, Portugal

<sup>c</sup>Cytec Canada Inc., 9061 Garner Road, Niagara Falls, Ontario, Canada L2E 6S5

\*Corresponding author

Tel: +351-234-370200; Fax: +351-234-370084; E-mail address: jcoutinho@ua.pt

## Experimental data of the systems IL + water + EtOH

**Table S1** Experimental data and critical point calculated by the Sherwood method<sup>1</sup> for the ternary system [TDTHP][Phosph] + H<sub>2</sub>O + EtOH.

| Phase          | Mass Fraction          |                          |                                    | Selectivity<br>( <i>S</i> ) |
|----------------|------------------------|--------------------------|------------------------------------|-----------------------------|
|                | <i>w</i> <sub>IL</sub> | <i>w</i> <sub>EtOH</sub> | <i>w</i> <sub>H<sub>2</sub>O</sub> |                             |
|                | 0.840                  | 0.000                    | 0.160                              |                             |
| Top            | 0.356                  | 0.449                    | 0.195                              | 1.74                        |
| Bottom         | 0.053                  | 0.539                    | 0.408                              |                             |
| Top            | 0.524                  | 0.335                    | 0.141                              | 3.13                        |
| Bottom         | 0.001                  | 0.432                    | 0.567                              |                             |
| Top            | 0.620                  | 0.255                    | 0.125                              | 4.39                        |
| Bottom         | 0.001                  | 0.317                    | 0.682                              |                             |
| Top            | 0.718                  | 0.161                    | 0.121                              | 5.68                        |
| Bottom         | 0.000                  | 0.190                    | 0.810                              |                             |
| Critical Point | 0.18                   | 0.54                     | 0.28                               |                             |

**Table S2** Experimental data and critical point calculated by the Sherwood method<sup>1</sup> for the ternary system [TDTHP][Deca] + H<sub>2</sub>O + EtOH.

| Phase          | Mass Fraction          |                          |                                    | Selectivity<br>( <i>S</i> ) |
|----------------|------------------------|--------------------------|------------------------------------|-----------------------------|
|                | <i>w</i> <sub>IL</sub> | <i>w</i> <sub>EtOH</sub> | <i>w</i> <sub>H<sub>2</sub>O</sub> |                             |
|                | 0.851                  | 0.000                    | 0.149                              |                             |
| Top            | 0.392                  | 0.419                    | 0.189                              | 2.00                        |
| Bottom         | 0.032                  | 0.509                    | 0.459                              |                             |
| Top            | 0.513                  | 0.341                    | 0.146                              | 3.09                        |
| Bottom         | 0.003                  | 0.429                    | 0.568                              |                             |
| Top            | 0.615                  | 0.256                    | 0.129                              | 4.34                        |
| Bottom         | 0.000                  | 0.315                    | 0.685                              |                             |
| Top            | 0.716                  | 0.162                    | 0.122                              | 5.31                        |
| Bottom         | 0.000                  | 0.201                    | 0.799                              |                             |
| Critical Point | 0.21                   | 0.55                     | 0.24                               |                             |

**Table S3** Experimental data and critical point calculated by the Sherwood method<sup>1</sup> for the ternary system [TDTHP]Cl + H<sub>2</sub>O + EtOH.

| Phase          | Mass Fraction          |                          |                                    | Selectivity<br>( <i>S</i> ) |
|----------------|------------------------|--------------------------|------------------------------------|-----------------------------|
|                | <i>w</i> <sub>IL</sub> | <i>w</i> <sub>EtOH</sub> | <i>w</i> <sub>H<sub>2</sub>O</sub> |                             |
|                | 0.866                  | 0.000                    | 0.134                              |                             |
| Top            | 0.438                  | 0.395                    | 0.167                              | 2.24                        |
| Bottom         | 0.079                  | 0.472                    | 0.449                              |                             |
| Top            | 0.620                  | 0.271                    | 0.109                              | 5.28                        |
| Bottom         | 0.000                  | 0.319                    | 0.681                              |                             |
| Top            | 0.807                  | 0.082                    | 0.111                              | 6.61                        |
| Bottom         | 0.000                  | 0.100                    | 0.900                              |                             |
| Top            | 0.723                  | 0.175                    | 0.102                              | 6.97                        |
| Bottom         | 0.000                  | 0.198                    | 0.802                              |                             |
| Critical Point | 0.25                   | 0.49                     | 0.26                               |                             |

**Table S4** Experimental data and critical point calculated by the Sherwood method<sup>1</sup> for the ternary system [TDTHP][CH<sub>3</sub>SO<sub>3</sub>] + H<sub>2</sub>O + EtOH.

| Phase          | Mass Fraction          |                          |                                    | Selectivity<br>( <i>S</i> ) |
|----------------|------------------------|--------------------------|------------------------------------|-----------------------------|
|                | <i>w</i> <sub>IL</sub> | <i>w</i> <sub>EtOH</sub> | <i>w</i> <sub>H<sub>2</sub>O</sub> |                             |
|                | 0.872                  | 0.000                    | 0.128                              |                             |
| Top            | 0.590                  | 0.257                    | 0.153                              | 2.29                        |
| Bottom         | 0.031                  | 0.306                    | 0.663                              |                             |
| Top            | 0.703                  | 0.176                    | 0.121                              | 3.64                        |
| Bottom         | 0.006                  | 0.218                    | 0.776                              |                             |
| Top            | 0.510                  | 0.305                    | 0.185                              | 5.18                        |
| Bottom         | 0.088                  | 0.381                    | 0.531                              |                             |
| Top            | 0.795                  | 0.085                    | 0.120                              | 6.67                        |
| Bottom         | 0.004                  | 0.096                    | 0.900                              |                             |
| Critical Point | 0.40                   | 0.37                     | 0.23                               |                             |

**Table S5** Experimental data and critical point calculated by the Sherwood method<sup>1</sup> for the ternary system [TDTHP]Br + H<sub>2</sub>O + EtOH.

| Phase          | Mass Fraction          |                          |                                    | Selectivity<br>( <i>S</i> ) |
|----------------|------------------------|--------------------------|------------------------------------|-----------------------------|
|                | <i>w</i> <sub>IL</sub> | <i>w</i> <sub>EtOH</sub> | <i>w</i> <sub>H<sub>2</sub>O</sub> |                             |
|                | 0.932                  | 0.000                    | 0.068                              |                             |
| Top            | 0.128                  | 0.572                    | 0.300                              | 0.566                       |
| Bottom         | 0.448                  | 0.426                    | 0.126                              |                             |
| Top            | 0.054                  | 0.555                    | 0.391                              | 2.74                        |
| Bottom         | 0.562                  | 0.348                    | 0.090                              |                             |
| Top            | 0.645                  | 0.280                    | 0.075                              | 4.73                        |
| Bottom         | 0.010                  | 0.436                    | 0.554                              |                             |
| Top            | 0.718                  | 0.223                    | 0.059                              | 7.76                        |
| Bottom         | 0.001                  | 0.326                    | 0.673                              |                             |
| Critical Point | 0.28                   | 0.53                     | 0.19                               |                             |

**Table S6** Experimental data and critical point calculated by the Sherwood method<sup>1</sup> for the ternary system [TDTHP][N(CN)<sub>2</sub>] + H<sub>2</sub>O + EtOH.

| Phase          | Mass Fraction          |                          |                                    | Selectivity<br>( <i>S</i> ) |
|----------------|------------------------|--------------------------|------------------------------------|-----------------------------|
|                | <i>w</i> <sub>IL</sub> | <i>w</i> <sub>EtOH</sub> | <i>w</i> <sub>H<sub>2</sub>O</sub> |                             |
|                | 0.967                  | 0.000                    | 0.033                              |                             |
| Top            | 0.434                  | 0.458                    | 0.108                              | 1.69                        |
| Bottom         | 0.114                  | 0.634                    | 0.252                              |                             |
| Top            | 0.622                  | 0.313                    | 0.065                              | 3.41                        |
| Bottom         | 0.020                  | 0.574                    | 0.406                              |                             |
| Top            | 0.712                  | 0.238                    | 0.050                              | 5.48                        |
| Bottom         | 0.009                  | 0.463                    | 0.528                              |                             |
| Top            | 0.787                  | 0.169                    | 0.044                              | 7.76                        |
| Bottom         | 0.008                  | 0.330                    | 0.662                              |                             |
| Critical Point | 0.28                   | 0.16                     | 0.56                               |                             |

**Table S7** Experimental data and critical point calculated by the Sherwood method<sup>1</sup> for the ternary system [TDTHP][NTf<sub>2</sub>] + H<sub>2</sub>O + EtOH.

| Phase          | Mass Fraction          |                          |                                    | Selectivity<br>( <i>S</i> ) |
|----------------|------------------------|--------------------------|------------------------------------|-----------------------------|
|                | <i>w</i> <sub>IL</sub> | <i>w</i> <sub>EtOH</sub> | <i>w</i> <sub>H<sub>2</sub>O</sub> |                             |
|                | 0.998                  | 0.000                    | 0.002                              |                             |
|                | 0.384                  | 0.553                    | 0.063                              |                             |
|                | 0.318                  | 0.612                    | 0.070                              |                             |
|                | 0.272                  | 0.652                    | 0.076                              |                             |
|                | 0.235                  | 0.686                    | 0.079                              |                             |
|                | 0.210                  | 0.707                    | 0.083                              |                             |
|                | 0.189                  | 0.727                    | 0.084                              |                             |
|                | 0.174                  | 0.738                    | 0.088                              |                             |
|                | 0.160                  | 0.752                    | 0.088                              |                             |
|                | 0.153                  | 0.754                    | 0.093                              |                             |
|                | 0.141                  | 0.766                    | 0.093                              |                             |
|                | 0.135                  | 0.767                    | 0.098                              |                             |
|                | 0.041                  | 0.765                    | 0.193                              |                             |
|                | 0.176                  | 0.741                    | 0.083                              |                             |
|                | 0.222                  | 0.702                    | 0.076                              |                             |
|                | 0.244                  | 0.684                    | 0.072                              |                             |
|                | 0.263                  | 0.668                    | 0.069                              |                             |
|                | 0.281                  | 0.652                    | 0.067                              |                             |
|                | 0.297                  | 0.638                    | 0.065                              |                             |
|                | 0.470                  | 0.048                    | 0.482                              |                             |
| Top            | 0.090                  | 0.788                    | 0.122                              | 2.57                        |
| Bottom         | 0.848                  | 0.144                    | 0.008                              |                             |
| Top            | 0.012                  | 0.737                    | 0.251                              | 4.16                        |
| Bottom         | 0.937                  | 0.058                    | 0.005                              |                             |
| Top            | 0.001                  | 0.605                    | 0.394                              | 6.12                        |
| Bottom         | 0.955                  | 0.041                    | 0.004                              |                             |
| Top            | 0.000                  | 0.485                    | 0.515                              | 11.31                       |
| Bottom         | 0.964                  | 0.033                    | 0.003                              |                             |
| Top            | 0.000                  | 0.226                    | 0.774                              | 21.66                       |
| Bottom         | 0.983                  | 0.015                    | 0.002                              |                             |
| Critical Point | 0.73                   | 0.26                     | 0.01                               |                             |



**Table S8** Absolute deviations between experimental data and NRTL correlated data of the ternary system [TDTHP][Phosph] + H<sub>2</sub>O + EtOH.

| IL              | Phase  | Experimental data |                   |                          | NRTL correlated data |                   |                          | Absolute Deviation<br>( $ w_{\text{exp}} - w_{\text{NRTL}} $ ) |                   |                          |
|-----------------|--------|-------------------|-------------------|--------------------------|----------------------|-------------------|--------------------------|----------------------------------------------------------------|-------------------|--------------------------|
|                 |        | $w_{\text{IL}}$   | $w_{\text{EtOH}}$ | $w_{\text{H}_2\text{O}}$ | $w_{\text{IL}}$      | $w_{\text{EtOH}}$ | $w_{\text{H}_2\text{O}}$ | $w_{\text{IL}}$                                                | $w_{\text{EtOH}}$ | $w_{\text{H}_2\text{O}}$ |
| [TDTHP][Phosph] |        | 0.840             | 0.000             | 0.160                    | 0.842                | 0.000             | 0.158                    | 0.002                                                          | 0.000             | 0.002                    |
|                 | Top    | 0.356             | 0.449             | 0.195                    | 0.363                | 0.437             | 0.200                    | 0.007                                                          | 0.012             | 0.005                    |
|                 | Bottom | 0.053             | 0.539             | 0.408                    | 0.059                | 0.542             | 0.399                    | 0.006                                                          | 0.003             | 0.009                    |
|                 | Top    | 0.524             | 0.335             | 0.141                    | 0.519                | 0.330             | 0.151                    | 0.005                                                          | 0.005             | 0.010                    |
|                 | Bottom | 0.001             | 0.432             | 0.567                    | 0.007                | 0.427             | 0.567                    | 0.006                                                          | 0.005             | 0.000                    |
|                 | Top    | 0.621             | 0.255             | 0.125                    | 0.614                | 0.259             | 0.128                    | 0.007                                                          | 0.004             | 0.003                    |
|                 | Bottom | 0.001             | 0.317             | 0.682                    | 0.001                | 0.313             | 0.686                    | 0.000                                                          | 0.005             | 0.004                    |
|                 | Top    | 0.718             | 0.161             | 0.121                    | 0.718                | 0.173             | 0.109                    | 0.000                                                          | 0.012             | 0.012                    |
|                 | Bottom | 0.000             | 0.190             | 0.810                    | 0.000                | 0.186             | 0.814                    | 0.000                                                          | 0.004             | 0.004                    |

**Table S9** Absolute deviations between experimental data and NRTL correlated data of the ternary system [TDTHP][Deca] + H<sub>2</sub>O + EtOH.

| IL            | Phase  | Experimental data |                   |                          | NRTL correlated data |                   |                          | Absolute Deviation<br>( $ w_{\text{exp}} - w_{\text{NRTL}} $ ) |                   |                          |
|---------------|--------|-------------------|-------------------|--------------------------|----------------------|-------------------|--------------------------|----------------------------------------------------------------|-------------------|--------------------------|
|               |        | $w_{\text{IL}}$   | $w_{\text{EtOH}}$ | $w_{\text{H}_2\text{O}}$ | $w_{\text{IL}}$      | $w_{\text{EtOH}}$ | $w_{\text{H}_2\text{O}}$ | $w_{\text{IL}}$                                                | $w_{\text{EtOH}}$ | $w_{\text{H}_2\text{O}}$ |
| [TDTHP][Deca] |        | 0.851             | 0.000             | 0.149                    | 0.855                | 0.000             | 0.146                    | 0.003                                                          | 0.000             | 0.003                    |
|               | Top    | 0.512             | 0.341             | 0.146                    | 0.508                | 0.335             | 0.157                    | 0.005                                                          | 0.006             | 0.011                    |
|               | Bottom | 0.004             | 0.429             | 0.568                    | 0.009                | 0.424             | 0.567                    | 0.005                                                          | 0.005             | 0.001                    |
|               | Top    | 0.615             | 0.256             | 0.129                    | 0.610                | 0.259             | 0.131                    | 0.005                                                          | 0.003             | 0.002                    |
|               | Bottom | 0.000             | 0.315             | 0.685                    | 0.001                | 0.311             | 0.688                    | 0.001                                                          | 0.004             | 0.003                    |
|               | Top    | 0.716             | 0.163             | 0.122                    | 0.710                | 0.177             | 0.113                    | 0.005                                                          | 0.014             | 0.009                    |
|               | Bottom | 0.000             | 0.201             | 0.799                    | 0.000                | 0.194             | 0.806                    | 0.000                                                          | 0.007             | 0.007                    |
|               | Top    | 0.392             | 0.419             | 0.189                    | 0.400                | 0.409             | 0.191                    | 0.008                                                          | 0.010             | 0.003                    |
|               | Bottom | 0.031             | 0.509             | 0.459                    | 0.040                | 0.510             | 0.450                    | 0.009                                                          | 0.001             | 0.009                    |

**Table S10** Absolute deviations between experimental data and NRTL correlated data of the ternary system [TDTHP]Cl + H<sub>2</sub>O + EtOH.

| IL        | Phase  | Experimental data |                   |                          | NRTL correlated data |                   |                          | Absolute Deviation<br>( $ w_{\text{exp}} - w_{\text{NRTL}} $ ) |                   |                          |
|-----------|--------|-------------------|-------------------|--------------------------|----------------------|-------------------|--------------------------|----------------------------------------------------------------|-------------------|--------------------------|
|           |        | $w_{\text{IL}}$   | $w_{\text{EtOH}}$ | $w_{\text{H}_2\text{O}}$ | $w_{\text{IL}}$      | $w_{\text{EtOH}}$ | $w_{\text{H}_2\text{O}}$ | $w_{\text{IL}}$                                                | $w_{\text{EtOH}}$ | $w_{\text{H}_2\text{O}}$ |
| [TDTHP]Cl |        | 0.866             | 0.000             | 0.134                    | 0.861                | 0.001             | 0.138                    | 0.005                                                          | 0.001             | 0.004                    |
|           | Top    | 0.438             | 0.395             | 0.168                    | 0.429                | 0.387             | 0.184                    | 0.008                                                          | 0.008             | 0.017                    |
|           | Bottom | 0.079             | 0.472             | 0.449                    | 0.058                | 0.488             | 0.455                    | 0.021                                                          | 0.016             | 0.006                    |
|           | Top    | 0.620             | 0.271             | 0.109                    | 0.623                | 0.254             | 0.123                    | 0.003                                                          | 0.017             | 0.014                    |
|           | Bottom | 0.000             | 0.319             | 0.681                    | 0.005                | 0.322             | 0.674                    | 0.005                                                          | 0.003             | 0.007                    |
|           | Top    | 0.723             | 0.175             | 0.102                    | 0.729                | 0.170             | 0.101                    | 0.006                                                          | 0.005             | 0.001                    |
|           | Bottom | 0.000             | 0.198             | 0.802                    | 0.000                | 0.202             | 0.798                    | 0.000                                                          | 0.004             | 0.004                    |
|           | Top    | 0.807             | 0.082             | 0.111                    | 0.815                | 0.091             | 0.094                    | 0.007                                                          | 0.009             | 0.017                    |
|           | Bottom | 0.000             | 0.100             | 0.900                    | 0.000                | 0.099             | 0.901                    | 0.000                                                          | 0.002             | 0.001                    |

**Table S11** Absolute deviations between experimental data and NRTL correlated data of the ternary system [TDTHP][CH<sub>3</sub>SO<sub>3</sub>] + H<sub>2</sub>O + EtOH.

| IL                                        | Phase  | Experimental data |                   |                          | NRTL correlated data |                   |                          | Absolute Deviation<br>( $ w_{\text{exp}} - w_{\text{NRTL}} $ ) |                   |                          |
|-------------------------------------------|--------|-------------------|-------------------|--------------------------|----------------------|-------------------|--------------------------|----------------------------------------------------------------|-------------------|--------------------------|
|                                           |        | $w_{\text{IL}}$   | $w_{\text{EtOH}}$ | $w_{\text{H}_2\text{O}}$ | $w_{\text{IL}}$      | $w_{\text{EtOH}}$ | $w_{\text{H}_2\text{O}}$ | $w_{\text{IL}}$                                                | $w_{\text{EtOH}}$ | $w_{\text{H}_2\text{O}}$ |
| [TDTHP][CH <sub>3</sub> SO <sub>3</sub> ] |        | 0.872             | 0.000             | 0.128                    | 0.881                | 0.000             | 0.119                    | 0.009                                                          | 0.000             | 0.009                    |
|                                           | Top    | 0.590             | 0.257             | 0.153                    | 0.597                | 0.245             | 0.158                    | 0.007                                                          | 0.013             | 0.005                    |
|                                           | Bottom | 0.031             | 0.306             | 0.663                    | 0.034                | 0.311             | 0.655                    | 0.002                                                          | 0.005             | 0.008                    |
|                                           | Top    | 0.703             | 0.176             | 0.121                    | 0.695                | 0.171             | 0.135                    | 0.008                                                          | 0.005             | 0.013                    |
|                                           | Bottom | 0.006             | 0.218             | 0.776                    | 0.019                | 0.208             | 0.774                    | 0.012                                                          | 0.010             | 0.002                    |
|                                           | Top    | 0.510             | 0.305             | 0.185                    | 0.504                | 0.308             | 0.188                    | 0.006                                                          | 0.003             | 0.003                    |
|                                           | Bottom | 0.088             | 0.381             | 0.531                    | 0.067                | 0.395             | 0.538                    | 0.021                                                          | 0.014             | 0.007                    |
|                                           | Top    | 0.795             | 0.085             | 0.120                    | 0.798                | 0.083             | 0.119                    | 0.002                                                          | 0.002             | 0.001                    |
|                                           | Bottom | 0.003             | 0.092             | 0.905                    | 0.013                | 0.093             | 0.894                    | 0.009                                                          | 0.001             | 0.010                    |

**Table S12** Absolute deviations between experimental data and NRTL correlated data of the ternary system [TDTHP]Br + H<sub>2</sub>O + EtOH.

| IL        | Phase  | Experimental data |                   |                          | NRTL correlated data |                   |                          | Absolute Deviation<br>( $ w_{\text{exp}} - w_{\text{NRTL}} $ ) |                   |                          |
|-----------|--------|-------------------|-------------------|--------------------------|----------------------|-------------------|--------------------------|----------------------------------------------------------------|-------------------|--------------------------|
|           |        | $w_{\text{IL}}$   | $w_{\text{EtOH}}$ | $w_{\text{H}_2\text{O}}$ | $w_{\text{IL}}$      | $w_{\text{EtOH}}$ | $w_{\text{H}_2\text{O}}$ | $w_{\text{IL}}$                                                | $w_{\text{EtOH}}$ | $w_{\text{H}_2\text{O}}$ |
| [TDTHP]Br |        | 0.937             | 0.000             | 0.063                    | 0.934                | 0.000             | 0.066                    | 0.003                                                          | 0.000             | 0.003                    |
|           | Top    | 0.054             | 0.555             | 0.391                    | 0.047                | 0.555             | 0.398                    | 0.007                                                          | 0.000             | 0.007                    |
|           | Bottom | 0.562             | 0.348             | 0.090                    | 0.551                | 0.346             | 0.103                    | 0.012                                                          | 0.002             | 0.013                    |
|           | Top    | 0.645             | 0.280             | 0.075                    | 0.649                | 0.273             | 0.078                    | 0.004                                                          | 0.007             | 0.003                    |
|           | Bottom | 0.010             | 0.436             | 0.554                    | 0.007                | 0.440             | 0.553                    | 0.003                                                          | 0.004             | 0.001                    |
|           | Top    | 0.128             | 0.572             | 0.300                    | 0.129                | 0.579             | 0.292                    | 0.000                                                          | 0.007             | 0.008                    |
|           | Bottom | 0.449             | 0.426             | 0.126                    | 0.451                | 0.418             | 0.132                    | 0.002                                                          | 0.008             | 0.006                    |
|           | Top    | 0.718             | 0.223             | 0.059                    | 0.718                | 0.220             | 0.062                    | 0.000                                                          | 0.003             | 0.003                    |
|           | Bottom | 0.001             | 0.326             | 0.673                    | 0.001                | 0.326             | 0.673                    | 0.000                                                          | 0.001             | 0.000                    |

**Table S13** Absolute deviations between experimental data and NRTL correlated data of the ternary system [TDTHP][N(CN)<sub>2</sub>] + H<sub>2</sub>O + EtOH.

| IL                           | Phase  | Experimental data |                   |                          | NRTL correlated data |                   |                          | Absolute Deviation<br>( $ w_{\text{exp}} - w_{\text{NRTL}} $ ) |                   |                          |
|------------------------------|--------|-------------------|-------------------|--------------------------|----------------------|-------------------|--------------------------|----------------------------------------------------------------|-------------------|--------------------------|
|                              |        | $w_{\text{IL}}$   | $w_{\text{EtOH}}$ | $w_{\text{H}_2\text{O}}$ | $w_{\text{IL}}$      | $w_{\text{EtOH}}$ | $w_{\text{H}_2\text{O}}$ | $w_{\text{IL}}$                                                | $w_{\text{EtOH}}$ | $w_{\text{H}_2\text{O}}$ |
| [TDTHP][N(CN) <sub>2</sub> ] |        | 0.967             | 0.000             | 0.033                    | 0.978                | 0.009             | 0.013                    | 0.011                                                          | 0.009             | 0.021                    |
|                              | Top    | 0.622             | 0.313             | 0.065                    | 0.623                | 0.311             | 0.067                    | 0.001                                                          | 0.003             | 0.002                    |
|                              | Bottom | 0.020             | 0.574             | 0.406                    | 0.021                | 0.574             | 0.405                    | 0.001                                                          | 0.000             | 0.001                    |
|                              | Top    | 0.712             | 0.238             | 0.050                    | 0.689                | 0.256             | 0.054                    | 0.023                                                          | 0.018             | 0.005                    |
|                              | Bottom | 0.009             | 0.463             | 0.528                    | 0.003                | 0.457             | 0.539                    | 0.006                                                          | 0.006             | 0.011                    |
|                              | Top    | 0.434             | 0.458             | 0.108                    | 0.462                | 0.437             | 0.102                    | 0.028                                                          | 0.021             | 0.006                    |
|                              | Bottom | 0.115             | 0.634             | 0.252                    | 0.144                | 0.626             | 0.230                    | 0.029                                                          | 0.008             | 0.022                    |
|                              | Top    | 0.787             | 0.169             | 0.044                    | 0.753                | 0.204             | 0.043                    | 0.034                                                          | 0.035             | 0.001                    |
|                              | Bottom | 0.009             | 0.330             | 0.662                    | 0.000                | 0.318             | 0.681                    | 0.008                                                          | 0.011             | 0.020                    |

**Table S14** Absolute deviations between experimental data and NRTL correlated data of the ternary system [TDTHP][NTf<sub>2</sub>] + H<sub>2</sub>O + EtOH.

| IL                         | Phase  | Experimental data |                   |                          | NRTL correlated data |                   |                          | Absolute Deviation<br>( $ w_{\text{exp}} - w_{\text{NRTL}} $ ) |                   |                          |
|----------------------------|--------|-------------------|-------------------|--------------------------|----------------------|-------------------|--------------------------|----------------------------------------------------------------|-------------------|--------------------------|
|                            |        | $w_{\text{IL}}$   | $w_{\text{EtOH}}$ | $w_{\text{H}_2\text{O}}$ | $w_{\text{IL}}$      | $w_{\text{EtOH}}$ | $w_{\text{H}_2\text{O}}$ | $w_{\text{IL}}$                                                | $w_{\text{EtOH}}$ | $w_{\text{H}_2\text{O}}$ |
| [TDTHP][NTf <sub>2</sub> ] |        | 0.998             | 0.000             | 0.002                    | 0.999                | 0.000             | 0.001                    | 0.001                                                          | 0.000             | 0.001                    |
|                            | Top    | 0.012             | 0.737             | 0.252                    | 0.049                | 0.697             | 0.254                    | 0.037                                                          | 0.039             | 0.002                    |
|                            | Bottom | 0.937             | 0.058             | 0.005                    | 0.903                | 0.090             | 0.007                    | 0.034                                                          | 0.032             | 0.002                    |
|                            | Top    | 0.090             | 0.789             | 0.122                    | 0.152                | 0.735             | 0.114                    | 0.062                                                          | 0.054             | 0.008                    |
|                            | Bottom | 0.848             | 0.144             | 0.009                    | 0.864                | 0.128             | 0.008                    | 0.017                                                          | 0.016             | 0.001                    |
|                            | Top    | 0.000             | 0.485             | 0.515                    | 0.005                | 0.480             | 0.515                    | 0.005                                                          | 0.005             | 0.000                    |
|                            | Bottom | 0.964             | 0.033             | 0.003                    | 0.930                | 0.065             | 0.005                    | 0.035                                                          | 0.032             | 0.002                    |
|                            | Top    | 0.001             | 0.605             | 0.394                    | 0.015                | 0.593             | 0.392                    | 0.014                                                          | 0.012             | 0.002                    |
|                            | Bottom | 0.955             | 0.041             | 0.004                    | 0.920                | 0.074             | 0.006                    | 0.035                                                          | 0.033             | 0.002                    |
|                            | Top    | 0.000             | 0.226             | 0.774                    | 0.000                | 0.222             | 0.778                    | 0.000                                                          | 0.004             | 0.004                    |
|                            | Bottom | 0.983             | 0.015             | 0.002                    | 0.954                | 0.043             | 0.003                    | 0.029                                                          | 0.028             | 0.001                    |

## Comparison between all experimental ternary phase diagrams

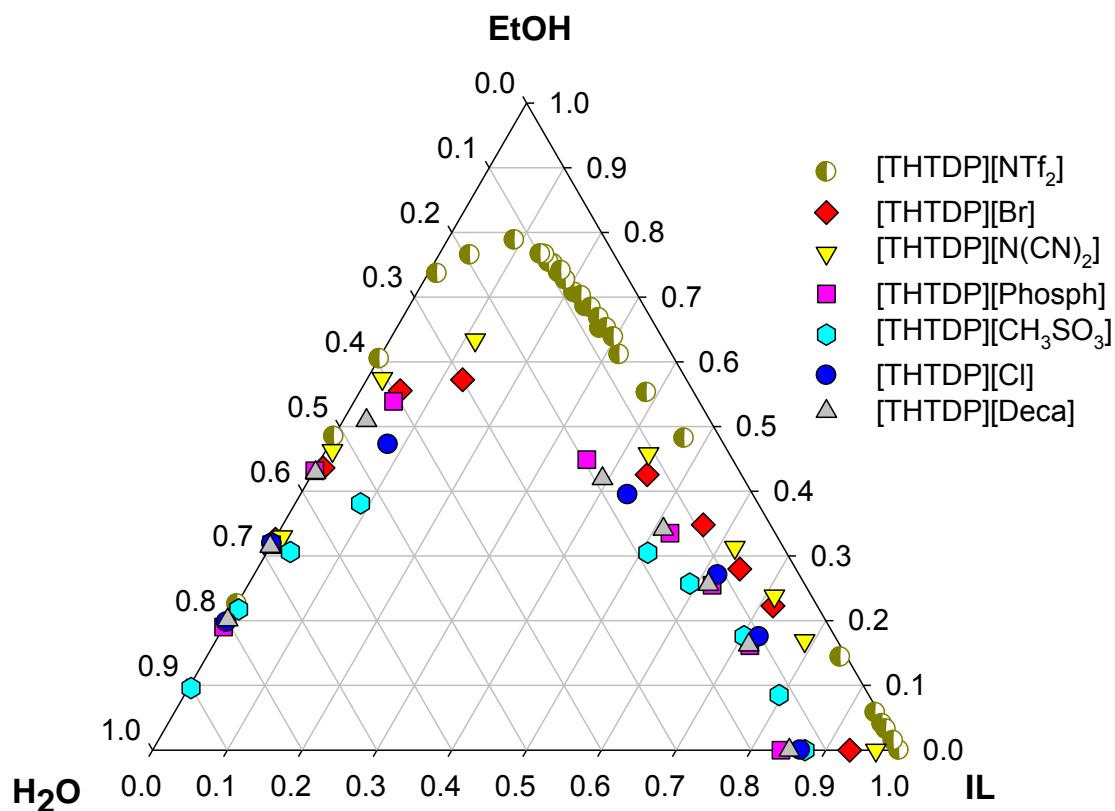

**Fig. S1** Experimental ternary phase diagrams for all IL + EtOH + H<sub>2</sub>O systems at 298.15 K  
(mass fraction units).



## Consistency of the experimental tie-lines

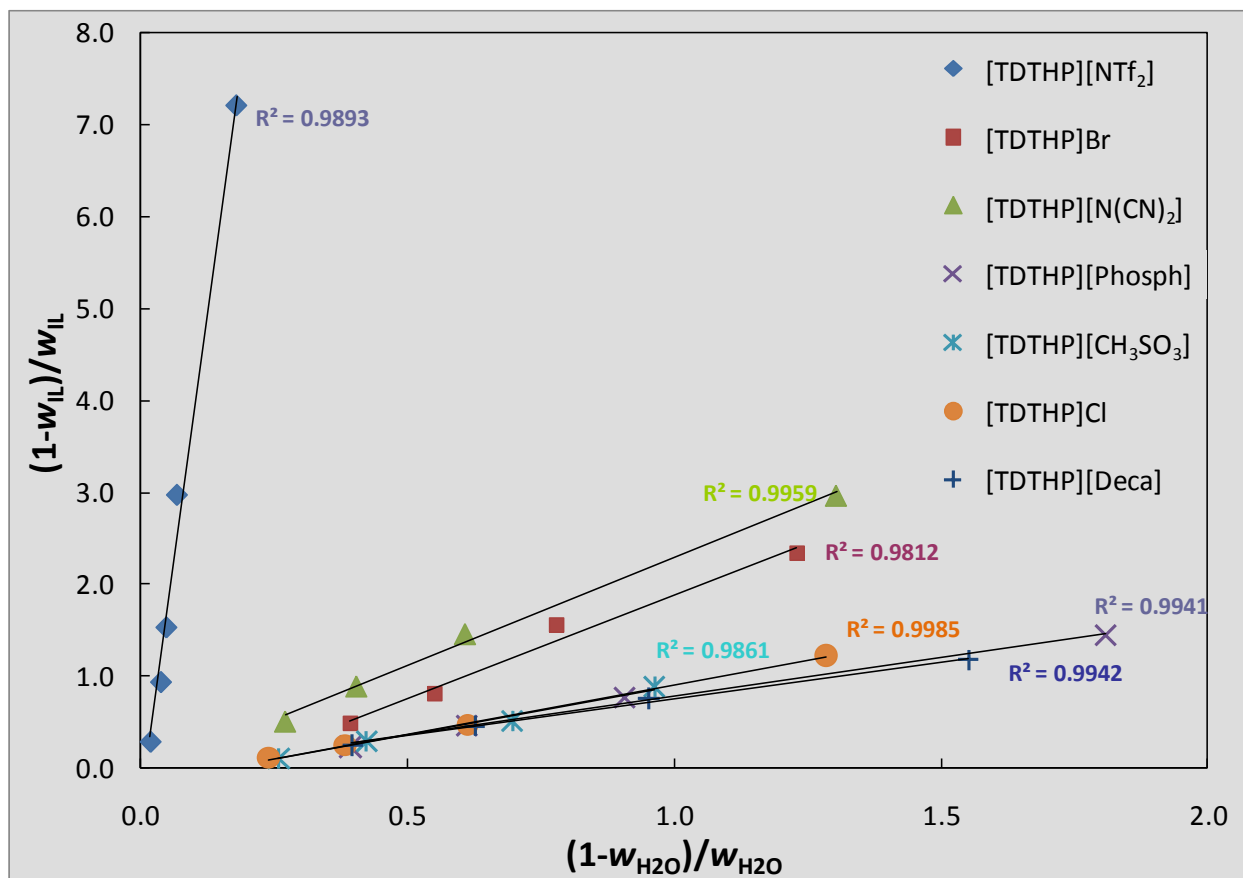

**Fig. S2** Tie-Lines correlation using the Othmer-Tobias correlation<sup>2</sup> for each ternary system IL + EtOH + Water.

## ***S* and *D* dependence on the ethanol content**

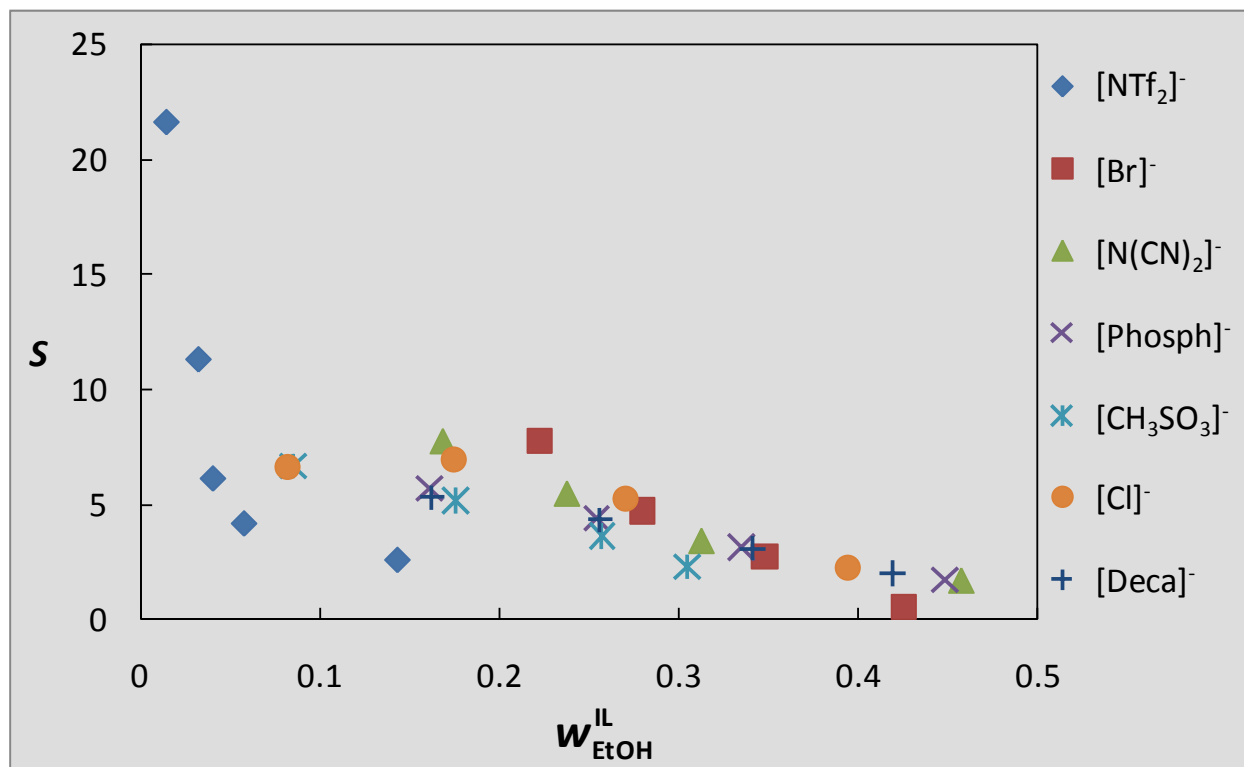

**Fig. S3** Correlation of ethanol selectivities ( $S$ ) as a function of the ethanol content in the ionic liquid rich-phase ( $w_{\text{EtOH}}^{\text{IL}}$ ).

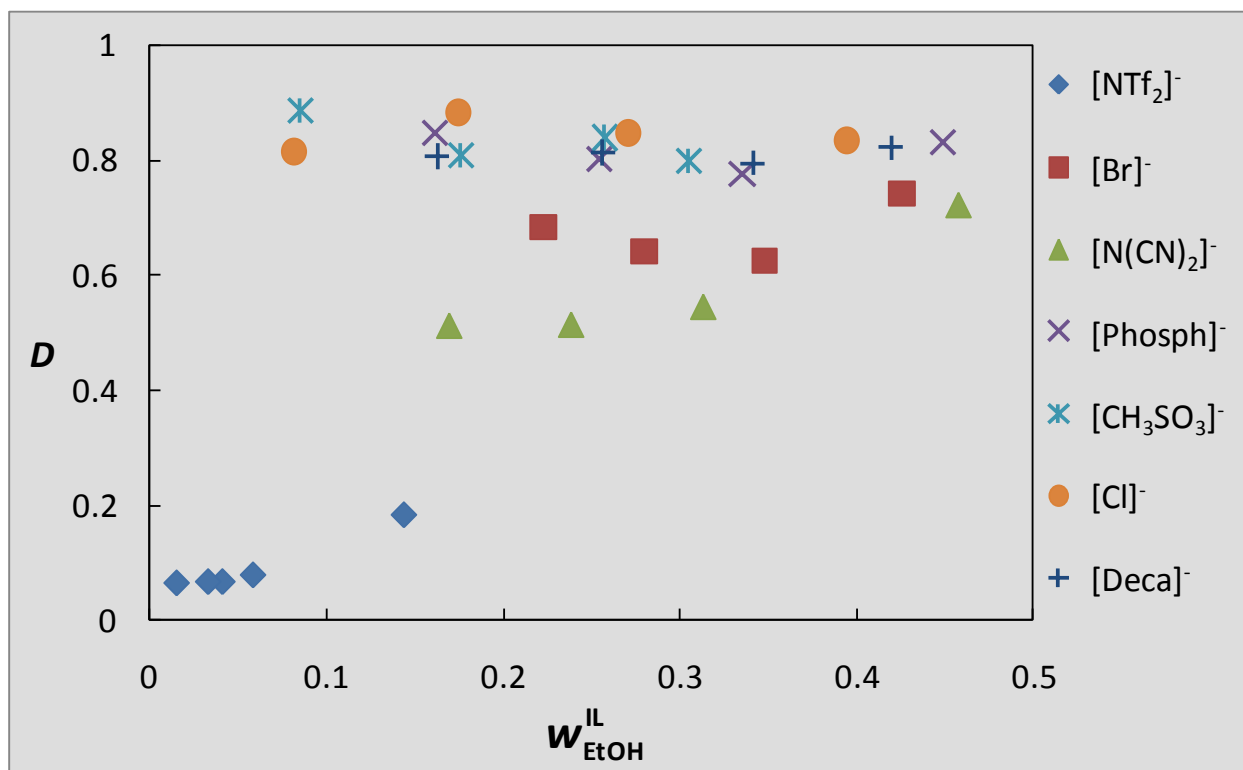

**Fig. S4** Correlation of ethanol distribution coefficients ( $D$ ) as a function of the ethanol content in the ionic liquid rich-phase ( $w_{\text{EtOH}}^{\text{IL}}$ ).

## NRTL parameter estimation

The expressions for the excess Gibbs energy ( $g^E$ ) and the logarithm of the activity coefficient ( $\ln \gamma_i$ ) given by the NRTL model can be written as<sup>3</sup>:

$$\frac{g^E}{RT} = \sum_i^{n_c} x_i \ln \gamma_i = \sum_i^{n_c} \frac{x_i L_i}{M_i} \quad (\text{S1})$$

$$\ln \gamma_i = \frac{L_i}{M_i} + \sum_j^{n_c} \frac{x_j G_{ij}}{M_j} \left( \tau_{ij} - \frac{L_j}{M_j} \right) \quad (\text{S2})$$

$$L_i = \sum_k^{n_c} x_k \tau_{ki} G_{ki} \quad (\text{S3})$$

$$M_i = \sum_k^{n_c} x_k G_{ki} \quad (\text{S4})$$

$$G_{ij} = e^{-\alpha_{ij} \tau_{ij}} \quad (\text{S5})$$

$$\tau_{ij} = \frac{(g_{ij} - g_{ii})}{RT} = \frac{\Delta g_{ij}}{RT}, \quad i \neq j \text{ and } \tau_{ij} = 0, \quad i = j \quad (\text{S6})$$

Here  $i, j, k \in \{1, 2, 3\}$  represent the different molecular species in the mixture (1 – water, 2 – ethanol, 3 – IL),  $n_c$  is the number of components, and  $x_i$  refers to molar fractions. In the present work, the parameter estimation task was formulated as the solution of a nonlinear programming problem (NLP), using the weighted norm of the differences between the experimental mass fractions and the values predicted by the model as an objective function<sup>4</sup>:

$$\min_z \phi = \sum_i^{n_t} \sum_j^{n_c} \sum_k^2 \omega_{ijk} e_{ijk}(\tau)^2$$

where  $e_{ijk}(\tau) = w_{ijk}^{\text{exp}} - w_{ijk}^{\text{mod}}(\tau)$ , and the superscripts *exp* and *mod* correspond to experimental and predicted mass fraction values, respectively. The summations in this equation are taken over all tie-lines (*i*), components (*j*) and phases (*k*), and  $\omega_{ijk}$  is a weight factor associated with each error term. Using the isothermal data available for each system, the objective function  $\phi$  was minimized by simultaneous determination of all model variables (here denoted as *z*), subject to constraints of iso-activity, the NRTL activity model described by equations (S2-S6), sum of mass and molar fraction restrictions, and magnitude bounds for the model parameters  $\tau_{ij}$ . Mass fractions were used in the data regression, due to the large differences in molecular weights between the ILs and the molecular components.

To address the non-convexity of this nonlinear parameter estimation problem, which often leads to multiple local optimal solutions, this problem was implemented in GAMS<sup>5</sup>, taking advantage of the robustness of the numerical solvers available in this system. Additionally, considerable care was placed in the reformulation of the original model equations, as NLP constraints. This was done by introducing new terms and using algebraic rearrangements in the resultant equations that allowed the nonlinearity of each individual component of the model to be significantly decreased. Scaling of the resulting variables and equations was performed, also with the purpose of reducing the overall model nonlinearity. A subset of fundamental model variables was identified, and proper initialization and bounds were established for them. These values were then propagated throughout the model to initialize and bound the remaining variables, allowing both a more consistent global model initialization, and avoiding the nonconvergence of the NLP due to the inability of locating feasible solutions. This step was verified to be an

essential task to guarantee the convergence of the parameter estimation. The following numerical solvers were used in this study:

- CONOPT<sup>6</sup> – based on the General Reduced Gradient and Successive Quadratic Programming algorithms; provides a very robust initialization and location of feasible points in highly constrained problems; suitable for medium to large scale NLPs;
- OQNLP<sup>7</sup> – a global solver based on various heuristic multistart algorithms; designated to rapidly finding various local optima of smooth constrained NLPs;
- BARON<sup>8</sup> – a global numerical solver for continuous and discrete variables; based on a deterministic global optimization algorithm; capable of determining and refining model bounds in different regions of the solution domain.

Each of these solvers was tested with each LLE ternary system, to ensure that the set of parameters obtained corresponds to the best possible solutions using this type of formulation. The values of the residual function  $\phi$  at the optimum were comprised between  $0.7 \times 10^{-3}$  (system with  $\text{Br}^-$ ) and  $7 \times 10^{-3}$  (for the system with  $[\text{N}(\text{CN})_2]^-$ ). This was possible through the extensive search for alternative solutions (especially with the OQNLP solver) and by increasing the bounds allowed for the  $\tau_{ij}$  parameters, which in various cases resulted in higher values for the interaction parameter  $\tau_{13}$  (water – IL). This step should be interpreted with caution, since it corresponds to larger values of the respective  $\Delta g_{ij}$  interaction term, and would perhaps benefit from additional confirmation provided by including in the regression experimental data obtained at different temperatures.

The computer requirements for the parameter estimation task were of the order of one second of CPU, using GAMS/CONOPT on a current Intel Xeon Linux workstation. Due to different nature of the algorithms, a maximum of 30 minutes of CPU were allowed for the runs with the OQNLP solver, and 60 minutes for BARON. Within the time allowed and for all the systems considered, BARON was unable to find a guaranteed global solution, stopping often at a local solution. On the other hand, the OQNLP solver was able to identify several distinct local solutions of the problems. This number of local optima found varied from 5 (for the system with [NTf<sub>2</sub>]) to 77 (system with Br<sup>-</sup>), and corresponded typically to approximately 20 different local optima, in most of the cases considered. Within this set, the solutions provided by CONOPT corresponded typically to the best (or second best) local solutions known for each problem, after reasonable tuning of the initialization scheme. From an overall perspective, the experience acquired in this part of the work indicates that the critical steps in this parameter estimation task were the proper construction of the NLP (through reformulation, scaling, initialization and bounding of the original mathematical model), and the availability of a multistart optimizer, capable of largely eliminating the effects of the initial estimates on the quality of the solutions obtained.

## References

1. J. D. Seader and E. J. Henley, in *Separation Process Principles*, John Wiley & Sons, New York edn., 1998.
2. D. Othmer and P. Tobias, *Ind. Eng. Chem.*, 1942, **34**, 693-696.
3. J. P. O'Connell and J. M. Haile, in *Thermodynamics: Fundamentals for Applications*, Cambridge University Press, New York edn., 2005.
4. J. M. Sørensen, T. Magnussen, P. Rasmussen and A. Fredenslund, *Fluid Phase Equilib.*, 1979, **3**, 47-82.
5. A. Brooke, D. Ketndrick, A. Meeraus and R. Raman, in *GAMS - A User's Guide*, GAMS Development Corporation, Washington DC edn., 2005.
6. A. S. Drud, *ORSA J. Comput.*, 1992, **6**, 207-216.
7. <http://www.gams.com/dd/docs/solvers/oqnlp.pdf>, Accessed December 3<sup>rd</sup>, 2010.
8. M. Tawarmalani and N. V. Sahinidis, in *Convexification and Global Optimization in Continuous and Mixed-Integer Nonlinear Programming*, Kluwer Academic Publishers, Dordrecht edn., 2002.
